# Supplementary material for: Primary care EMR and administrative data linkage in Alberta, Canada: describing the suitability for hypertension surveillance
Source: PubMed Central journal article supplement — BMJ Health Care Inform. 2020 Aug 23;27(3):e100161. doi: 10.1136/bmjhci-2020-100161 (PMC7445345; doi:10.1136/bmjhci-2020-100161), 2020-08-23
Supplement: bmjhci-2020-100161supp001.pdf [file bmjhci-2020-100161supp001.pdf]

**Supplementary Table 1.** Comparison of patient characteristics in the provincial healthcare registry and the CPCSSN primary care EMR database for Alberta.

|                                                 | Administrative Data<br>(general population) | Primary care EMR Data<br>(all patients in database)                                         |
|-------------------------------------------------|---------------------------------------------|---------------------------------------------------------------------------------------------|
| Data source                                     | 2017/18 AHCIP Registry <sup>a</sup>         | CPCSSN data for Alberta up to June 30, 2018; patients with at least 1 visit in last 2 years |
| Total adults, N                                 | 3,481,340*                                  | 204,825                                                                                     |
| Female, n (%)                                   | 1,731,372 (49.7)                            | 115,351 (56.3)                                                                              |
| Male, n (%)                                     | 1,749,968 (50.3)                            | 89,428 (43.7)                                                                               |
| Age, mean (SD)                                  | <i>not available</i>                        | 49.7 (18.3)                                                                                 |
| Age groups, n (%)                               |                                             |                                                                                             |
| 20-39 years                                     | 1,401,383 (40.3)                            | 63,153 (30.8)                                                                               |
| 40-59 years                                     | 1,235,444 (35.5)                            | 70,545 (34.4)                                                                               |
| 60-69 years                                     | 462,792 (13.3)                              | 33,786 (16.5)                                                                               |
| 70-79 years                                     | 240,733 (6.9)                               | 19,755 (9.6)                                                                                |
| 80 years and older                              | 140,988 (4.0)                               | 12,055 (5.9)                                                                                |
| Urban, n (%)                                    | 4,184,418** (91.0)                          | 159,737 (78.0)                                                                              |
| Rural, n (%)                                    | 413,186** (9.0)                             | 39,389 (19.2)                                                                               |
| Missing/unknown residence or postal code, n (%) | 485 (0.01)                                  | 5699 (2.8)                                                                                  |

\*Adults 20 years and older

\*\*Urban/rural calculated based on second digit of postal code of each Local Geographic Area for discrete patients (all ages); denominator: 4,598,089

<sup>a</sup> Alberta Health. Alberta Health Care Insurance Plan Statistical Supplement 2017/2018 [Internet]. 2018. Available from: [https://open.alberta.ca/dataset/3c9a0637-29c1-4cb2-93ba-c2ac090ab2b5/resource/bca9cd6e-803d-439c-be69-b15a8dd800a4/download/ahcip-statistical-supplement-2017\\_2018\\_final.pdf](https://open.alberta.ca/dataset/3c9a0637-29c1-4cb2-93ba-c2ac090ab2b5/resource/bca9cd6e-803d-439c-be69-b15a8dd800a4/download/ahcip-statistical-supplement-2017_2018_final.pdf)

AHCIP=Alberta Health Care Insurance Plan; CPCSSN=Canadian Primary Care Sentinel Surveillance Network; EMR=electronic medical record; SD=standard deviation
